# Supplementary material
Source: Elsevier journal article supplement (https://www.sciencedirect.com/science/article/pii/S2013251422001109)
Supplement: mmc2 [file S2013251422001109:mmc2.docx]

**S2 File.** Patients’ characteristics enrolled in the included studies.

| **Reference** | **Epidemiologic characteristics** | | | **Complications** | | | | |
| --- | --- | --- | --- | --- | --- | --- | --- | --- |
| **Age (years)** | **Gender male n (%)** | **time between symptom onset and**  **hospitalization** | **ARDS n (%)** | **Acute cardiac injury**  **n (%)** | **Secondary infection n (%)** | **Sepsis/Shock n (%)** | **In-hospital mortality n (%)** |
| Wang et al.2 | 56 (42 - 68) | 75 (54.3) | 7 (4 - 8) | 27 (19.6) | 10 (7.2) | ... | 12 (8.7) | 6 (4.3) |
| Cheng et al.3 | 63 (50 - 71) | 367 (52.4) | 10 (7 - 13) | ... | ... | ... | ... | 113 (16.1) |
| Hirsch et al.4 | 64 (52 - 75) | 3,317 (60.9) | ... | ... | ... | ... | ... | 888 (16.3) |
| Cheng et al.5 | 63 (51 - 71) | 374 (52.7) | 10 (7 - 13) | ... | ... | ... | ... | 89 (12.5) |
| Shi et al.6 | 64 (21 - 95) | 205 (49.3) | 10 (1 - 30) | 97 (23.3) | 82 (19.7) | ... | ... | 57 (13.7) |
| Richardson et al.7 | 63 (52 - 75) | 3,437 (60.3) | ... | ... | ... | ... | ... | 553 (21.0) |
| Guan et al.8 | 47 (35 - 58) | 640 (58.2) | 4 (2 - 7) | 37 (3.4) | ... | ... | 12 (1.1) | 15 (1.4) |
| Zhang et al.9 | 46.6 ± 13.8 | 295 (51.5) | ... | 14 (2.2) | ... | ... | 2 (0.3) | ... |
| Yu et al.10 | 64 (57 - 70) | 139 (61.5) | ... | 161 (71.2) | 61 (27.0) | 49 (21.7) | 36 (15.9) | 9 (4.0) |
| Hong et al.15 | 55.4 ± 17.1 | 38 (38.8) | 7.7 ± 4.5 | 18 (18.4) | 11 (11.2) | ... | 9 (9.2) | 5 (5.1) |
| Huang et al.16 | 49 (41 – 58) | 30 (73.0) | 7 | 12 (29.0) | 5 (12.0) | 4 (10.0) | 3 (7.0) | 6 (15.0) |
| Lei et al.17 | 55 (43 - 63) | 14 (41.2) | 5 | 11 (32.4) | 5 (14.7) | 10 (29.4) | 10 (29.4) | 7 (20.6) |
| Wang et al.18 | 51 (36 – 65) | 57 (53.3) | 7 (3.5 - 9) | 28 (26.2) | 12 (11.2) | 17 (15.9) | 22 (20.6) | 19 (17.8) |
| Wang et al.19 | 54 (38 - 69) | 67 (57.8) | ... | 11 (9.5) | ... | ... | ... | ... |

| Yang et al.20 | 55 (40 - 67) | 107 (50.5) | ... | ... | 22 (10.4) | ... | ... | ... |
| --- | --- | --- | --- | --- | --- | --- | --- | --- |
| Yang et al.21 | 59.7 ± 13·3 | 35 (67.0) | 9·5 (7 - 12·5) | 35 (67.0) | 12 (23.0) | 7 (13.5) | ... | 32 (61.5) |
| Zhang et al.22 | 55 (39 - 66) | 108 (48.9) | 7 (4 - 10) | 48 (21.7) | 17(7.7) | 57 (25.8) | 15 (6.8) | 12 (5.4) |
| Zhao et al.23 | 46 ± 16.3 | 49 (53.8) | 4 | ... | 14 (15.4) | ... | ... | 2 (2.2) |
| Zheng et al.24 | 66 (58 - 76) | 23 (67.6) | 10 | 33 (97.1) | 13 (38.2) | ... | ... | ... |
| Zhou et al.25 | 56 (46 - 67) | 119 (62.0) | 11 (8 - 14) | 59 (31.0) | 33 (17.0) | 28 (15.0) | 112 (59.0) | 137 (71.7) |
| Chen et al.26 | 55.5 ± 13.1 | 67 (68.0) | ... | 17 (17.0) | ... | 5 (5.0) | 4 (4.0) | 11 (11.0) |
| Arentz et al.27 | 70 (43 - 92) | 11 (52.0) | 3.5 | 20 (95.2) | 7 (33.3) | 4 (19.0) | ... | 11 (52.4) |
| Yang et al.28 | 45.1 ± 13.3 | 81 (54.4) | 6.8 (5.0) | 0 (0.0) | 0 (0.0) | ... | 0 (0.0) | 0 (0.0) |
| Wan et al.29 | 47 (36 - 55) | 72 (53.3) | ... | 21 (15.6) | 10 (7.4) | 7 (5.1) | 1 (0.7) | 1 (0.7) |
| Hu et al.30 | 61 (23 - 91) | 166 (51.4) | 9 (1- 60) | 13 (4.0) | 24 (7.4) | 9 (2.8) | 43 (13.3) | ... |
| Pei et al.31 | 56.3 ± 13.4 | 182 (54.7) | 9 (7 - 11) | ... | ... | ... | ... | 28 (8.7) |
| Aggarwal et al.32 | 67 (38 - 95) | 12 (75.0) | ... | 5 (31.0) | 4 (25.0) | 12 (75.0) | ... | ... |
| Chen et al.33 | 62 (44 - 70) | 171 (62.0) | 10 (7 - 13) | 196 (72.0) | 89 (44.0) | ... | 179 (65.0) | 113 (41.2) |
| Deng et al.34 | 40 (33 - 57) | 124 (55.1) | ... | 108 (48.0) | 66 (29.3) | ... | 13 (5.8) | 109 (48.4) |
| Guo et al.35 | 58.5 ± 14.6 | 91 (48.7) | ... | 46 (24.6) | ... | ... | ... | 43 (23.0) |
